# Supplementary material for: Resilience Testing of Health Systems: How Can It Be Done?
Source: MDPI journal article supplement (doi:10.3390/ijerph18094742), 2021-04-29
Supplement: s1 [file s1]

Supplementary Table S1: A Heuristic: Four Dimensions of Classification of Shocks to a Health System

| Dimension 1 | Time                | Dimension 2  | Expansion                                              | Dimension 3 | Origin                                      | Dimension 4    | Impact                                                              |
|-------------|---------------------|--------------|--------------------------------------------------------|-------------|---------------------------------------------|----------------|---------------------------------------------------------------------|
| Onset       | Rapid<br>Slow       | Human being  | Systematically<br>Locally                              | Creature    | Human<br>Plant<br>Animal<br>Microbe / Virus | People         | Individual<br>Population<br>Patients<br>Staff                       |
| Occurrence  | Complete<br>Gradual | Geographical | Local<br>Regional<br>National<br>Continental<br>Global | Particle    | Non-synthetic<br>Synthetic                  | Non-human life | Animal/Species<br>Plant                                             |
| Continuity  | Acute<br>Chronic    | Elemental    | Air<br>Water<br>Terra<br>Ice Vapor                     | Nature      | Air<br>Water<br>Terra<br>Ice Vapor          | Infrastructure | Technical<br>Logistical<br>Medical<br>Non-Medical<br>Pharmaceutical |
|             |                     |              |                                                        |             |                                             | Systems        | Society<br>Political<br>Health                                      |
